- Stefani SJ: A new neurologic and adaptive capacity scoring system for evaluating obstetric medications in full-term newborns. *ANESTHESIOLOGY* 56:340-350, 1982
10. Knapp AB, Maguire W, Keren G, Karmen A, Levitt B, Miura DS, Somberg JC: The cimetidine-lidocaine interaction. *Ann Intern Med* 98:174-177, 1983
  11. Feely J, Wilkinson GR, Wood AJJ: Reduction of liver blood flow and propranolol metabolism by cimetidine. *N Engl J Med* 304:692-695, 1981
  12. Jensen JC, Gugler R: Cimetidine interaction with liver microsomes *in vitro* and *in vivo*. Involvement of an activated complex with cytochrome P-450. *Biochem Pharmacol* 34:2141-2146, 1985
  13. Richards DA: Comparative pharmacodynamics and pharmacokinetics of cimetidine and ranitidine. *J Clin Gastroenterol* 5(Suppl 1):81-90, 1983
  14. McAuley DM, Moore J, McCaughey W, Donnelly BD, Dundee JW: Ranitidine as an antacid before elective caesarean section. *Anaesthesia* 38:108-114, 1983
  15. Morison DH, Dunn GL, Fargas-Babjak AM, Moudgil GC, Smedstad K, Woo J: A double-blind comparison of cimetidine and ranitidine as prophylaxis against gastric aspiration syndrome. *Anesth Analg* 61:988-992, 1982
  16. Walkenstein SS, Dubb JW, Randolph WC, Westlake WJ, Stote RM, Intoccia AP: Bioavailability of cimetidine in man. *Gastroenterology* 74:360-365, 1978
  17. Rendic S, Ruf HH, Weber P, Kajfez: Cimetidine and ranitidine: Their interaction with human and pig liver microsomes and with purified cytochrome P-450. *Eur J Drug Metab Pharmacokinet* 9:195-200, 1984
  18. Feely J, Guy E: Lack of effect of ranitidine on the disposition of lignocaine. *Br J Clin Pharmacol* 15:378-379, 1983
  19. Breen KJ, Bury R, Desmond PV, Mashford ML, Morphett B, Westwood B, Shaw RG: Effects of cimetidine and ranitidine on hepatic drug metabolism. *Clin Pharmacol Ther* 31:297-300, 1982
  20. Nies AS, Shand DG, Wilkinson GR: Altered hepatic blood flow and drug disposition. *Clin Pharmacokinet* 1:135-155, 1976
  21. Feely J, Wade D, McAllister CB, Wilkinson GR, Robertson D: Effect of hypotension on liver blood flow and lidocaine disposition. *N Engl J Med* 307:866-869, 1982
  22. Mather LE, Tucker GT, Murphy TM, Stanton-Hicks M d'A, Bonica JJ: Hemodynamic drug interaction: Peridural lidocaine and intravenous ephedrine. *Acta Anaesthesiol Scand* 20:207-210, 1976
  23. Scott DB, Jebson JR, Braid DP, Ortengren B, Frisch P: Factors affecting plasma levels of lignocaine and prilocaine. *Br J Anaesth* 44:1040-1048, 1972
  24. Inoue R, Sugauma T, Echizen H, Ishizaki T, Kushida K, Tomono Y: Plasma concentrations of lidocaine and its principal metabolites during intermittent epidural anesthesia. *ANESTHESIOLOGY* 63:304-310, 1985
  25. Ramanathan J, Bottorff M, Jeter JN, Khalil M, Sibai BM: The pharmacokinetics and maternal and neonatal effects of epidural lidocaine in preeclampsia. *Anesth Analg* 65:120-126, 1986

Anesthesiology  
69:1017-1022, 1988

## High Thoracic Epidural Sufentanil for Post-thoracotomy Pain: Influence of Epinephrine as an Adjuvant—A Double Blind Study

MARCEL A. HASENBOS, M.D., PH.D.,\* MATHIEU J. M. GIELEN, M.D., PH.D.,\* JAN BOS, M.D.,†  
EDMOND TIELBEEK, M.D.,† MICHAEL D'A STANTON-HICKS, M.B.,‡ DR. JAN VAN EGMOND§

A previous study in which epinephrine was added to morphine administered epidurally resulted in analgesia of a more intense nature, more rapid in onset, and of longer duration than when plain morphine solutions were used.<sup>1</sup> It was also noted that the adverse effects of pruritus,

nausea, vomiting, and difficulty of micturation were intensified by the addition of epinephrine. Furthermore, respiratory depression as reflected by diminished responsiveness to inhaled CO<sub>2</sub> between 6 and 16 h after morphine injection was greater following morphine-epinephrine solution. However, these studies were performed in human volunteers using a poorly lipid soluble drug. Results from three recent studies suggest that epinephrine added to highly lipid soluble opioids for lumbar epidural analgesia not only reduces their unwanted side effects, but also confers a longer duration and intensity of analgesia.<sup>2-4</sup> Sufentanil has a lipid solubility 1000 times greater than morphine, is even more selective than fentanyl for the  $\mu$ -receptor,<sup>5</sup> and is clinically more potent<sup>6</sup> than fentanyl or morphine. In addition, it has not yet been associated with delayed respiratory depression after epidural administration.<sup>7,8</sup> A previous study in which plain sufentanil was administered for thoracic epidural analgesia revealed a peak plasma level of sufentanil within 10 min of the initial and subsequent injections.<sup>9</sup> Respiratory rate,

\* Consultant Anesthetist.

† Registrar.

‡ Professor.

§ Physicist.

Received from the Institute for Anesthesiology, St. Radboud Hospital, University of Nijmegen, Postbox 9101, 6500 HB Nijmegen, The Netherlands. Accepted for publication August 30, 1988. Supported in part by Janssen Pharmaceutica, Beerse, Belgium. Presented in abstract form at an "Anaesthesia Scientific Seminar," June 14-18, 1987, Brussels.

Address reprint requests to Dr. Hasenbos: Institute for Anesthesiology, St. Radboud Hospital, University of Nijmegen, Postox 9101, 6500 HB Nijmegen, The Netherlands.

Key words: Analgesics: sufentanil. Anesthetic techniques: thoracic epidural. Sympathetic nervous system: catecholamines; epinephrine. Ventilation: blood gases; respiratory rate.

TABLE 1. Demographic Data: Mean (SEM)

|             | Group 1 (SP)*<br>(n = 12) | Group 2 (SE)*<br>(n = 11) |
|-------------|---------------------------|---------------------------|
| Age (yr)    | 46 (6)                    | 51 (6)                    |
| Height (cm) | 175 (3)                   | 175 (3)                   |
| Weight (kg) | 67 (4)                    | 71 (3)                    |

\* (SP) = sufentanil plain 50  $\mu\text{g}$  in 10 ml saline; (SE) = sufentanil 50  $\mu\text{g}$  in 10 ml saline + epinephrine 5  $\mu\text{g} \cdot \text{ml}^{-1}$ .

as an indicator of respiratory depression, decreased 25% after each injection associated with an increase in  $\text{PaCO}_2$  of 12 and 27% 60 min after the first and second injections, respectively. Because of the excellent quality of analgesia obtained, as well as the findings of this and an earlier study,<sup>4</sup> the present investigation was designed to determine whether epinephrine in a dose of 50  $\mu\text{g}$  when added to sufentanil 50  $\mu\text{g}$  in 10 ml saline for high thoracic epidural analgesia materially affects the incidence and severity of unwanted side effects, the duration and intensity of analgesia, the distribution of sufentanil, and the safety of administration of sufentanil at a high thoracic level.

#### MATERIALS AND METHODS

Twenty-three patients, ASA physical status 1–3, scheduled for elective pulmonary resection or correction of chest wall deformities were studied. Informed consent and institutional approval for human study was obtained. Selected demographic characteristics of the patients are shown in table 1. All patients received oral diazepam 10 mg 1 h before surgery. After intravenous access had been assured, an epidural catheter was inserted through a 16-gauge Tuohy needle inserted *via* a paramedian approach at T3–4 using the hanging-drop method. The epidural catheter was directed cephalad for a distance of 3–4 cm and the patient was then positioned supine before an initial test dose of 3 ml of lidocaine 2% was injected. When bilateral sensory analgesia had been verified by pin-prick about 15 min after the test dose, a dose consisting of bupivacaine 0.5% with epinephrine 5  $\mu\text{g} \cdot \text{ml}^{-1}$  in a volume of 6–10 ml was injected.

Induction of anesthesia was achieved with thiopental 5–7  $\text{mg} \cdot \text{kg}^{-1}$  followed by pancuronium 0.1  $\text{mg} \cdot \text{kg}^{-1}$  and droperidol 5 mg. After tracheal intubation, anesthesia was maintained with halothane 0.3–0.5% and a  $\text{N}_2\text{O}-\text{O}_2$  mixture with an  $\text{FI}_{\text{O}_2}$  ranging between 0.3 and 0.5. Mechanical ventilation was set to deliver a tidal volume of 10  $\text{ml} \cdot \text{kg}^{-1}$  and an end-tidal  $\text{PaCO}_2$  of 34–38 mmHg was maintained. A radial arterial cannula was inserted to allow for continuous measurement of blood pressure and for serial sampling of blood for plasma sufentanil and blood gas estimations. No opiates were administered before or during the surgical procedure.

Following completion of surgery, all patients were allowed to resume spontaneous breathing, and following tracheal extubation they were transferred to an adjacent unit where they remained under continuous observation for the next 3 days. The severity of postoperative pain was assessed at 5, 15, and 30 min and thereafter each 30 min by means of the inverse visual analog scale (IVAS), where 0 is the most severe pain and 10 is no pain. A coded ampule containing sufentanil 50  $\mu\text{g}$  in 10 ml of saline, with or without epinephrine 5  $\mu\text{g} \cdot \text{ml}^{-1}$  was administered *via* the epidural catheter on request of the patient.

Plasma sufentanil measurements were made on 10 ml arterial samples drawn at 0, 3, 5, 10, 20, 30, 60, 120, and 180 min following injection. After extraction, all samples were subjected to duplicate ratio-immune assay having a detection limit of 0.01  $\text{ng} \cdot \text{ml}^{-1}$  and a coefficient of variation of 18%.<sup>10</sup> Maximum observed plasma sufentanil concentration ( $C_{\text{peak}}$ ) and the time at which it occurred ( $T_{\text{peak}}$ ) were noted for all patients. Areas under the plasma concentration-time curve for 0–15 min ( $\text{AUC}_{0-15}$ ) were noted visually and from 0–180 min ( $\text{AUC}_{0-180}$ ) were calculated by trapezoidal summation. Blood gas measurements were made at 0, 15, 30, and 60 min and each hour thereafter until analgesia had regressed to that level at which the patient requested a second dose. Following the second epidural injection of sufentanil (of the same composition as the first injection), the same sequence of arterial blood sampling was repeated.

Duration of analgesia was defined as the time elapsed between the epidural injection of sufentanil and the request of the patient for a repeat injection. Throughout the entire study, arterial blood pressure, electrocardiogram, and respiratory rate were monitored continuously. By observation and direct questioning, the side effects of pruritus, nausea, vomiting, somnolence, and urinary retention were noted. A physician was notified if the respiratory rate fell below 10  $\text{breaths} \cdot \text{min}^{-1}$  or the  $\text{PaCO}_2$  increased above 60 mmHg. All patients received at least two consecutive injections of epidural sufentanil with or without epinephrine 5  $\mu\text{g} \cdot \text{ml}^{-1}$ , in accordance with their group.

Statistical analysis of the data was performed by both the nonparametric Wilcoxon and Mann-Whitney P-tests;  $P < 0.05$  was considered significant. Data are expressed as mean with standard error of the mean in parentheses. In addition, the plasma sufentanil data were subjected to a two-tailed Student's *t* test. All tests were performed using the SAS statistical procedures.

#### RESULTS

*Analgesia.* Evidence of pain relief—slowing of the pulse and respiratory rate—were noted within 3 min following sufentanil administration. Analgesia as determined by the

IVAS had reached an average score of 7.8 (SEM = 0.9) in the SP group and 8.6 (SEM = 0.5) in the SE group by 15 min. By 30 min, these scores were 9.8 (SEM = 0.2) and 9.5 (SEM = 0.3), respectively, for SP and SE. Analgesia following the second sufentanil injection was nearly the same as that following the first injection, as illustrated in figure 1. Clinically relevant is the fact that the quality of analgesia allowed intensive pulmonary physical therapy to be employed without obvious discomfort for the patient.

Mean duration of analgesia after the first injection was 270 (SEM = 35) min for patients in the SP group and 316 (SEM = 30) min for those in the SE group. After the second injection, however, the sufentanil-epinephrine solution significantly prolonged analgesia duration by about 33% to 367 (SEM = 53) min compared with 271 (SEM = 19) min in the SE group.

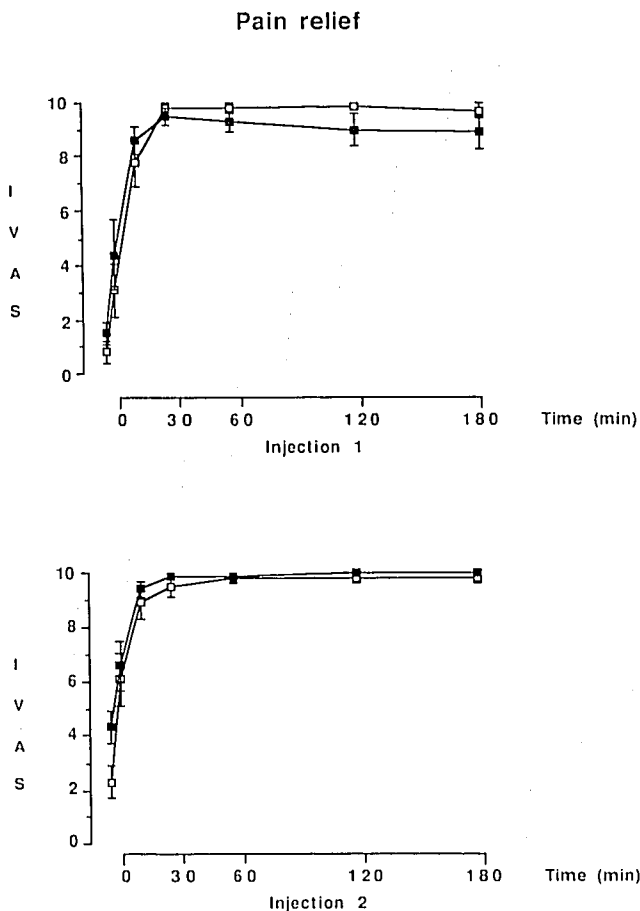

FIG. 1. Pain-relief scores after sufentanil or sufentanil-epinephrine assessed by means of the inverse visual analogue scale (IVAS) where 0 = maximum pain and 10 = no pain, plotted against time for 180 min after the first and second injections (n = 23). Mean values  $\pm$  SEM. There are no significant differences at any point.  $\square$  = plain sufentanil;  $\blacksquare$  = sufentanil + epinephrine.

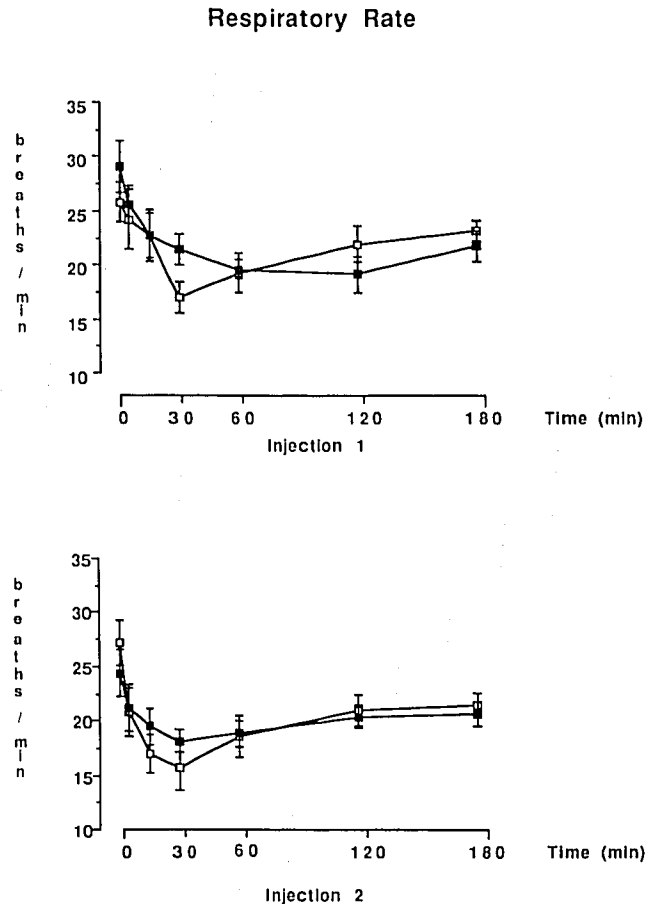

FIG. 2. Changes in respiratory rate (breaths  $\cdot$  min<sup>-1</sup>) after the first (n = 23) and second epidural injections (n = 21). Mean values  $\pm$  SEM. Significant differences were not observed at any of the sample points.  $\square$  = plain sufentanil;  $\blacksquare$  = sufentanil + epinephrine.

**Respiratory and Non Respiratory Side Effects.** There were no significant differences in respiratory rate between the patients receiving plain or epinephrine containing solutions of sufentanil following both the first and second injections. The average lowest respiratory rate for patients in the SP group was 17.0 (SEM = 1.5) breaths  $\cdot$  min<sup>-1</sup> at 30 min and 19.2 (SEM = 1.7) breaths  $\cdot$  min<sup>-1</sup> after 120 min in those in the SE group after the first injection (fig. 2). After the second injection, the mean lowest rate in the SP group was 15.7 (SEM = 2.1) breaths  $\cdot$  min<sup>-1</sup> at 30 min.

However, one patient who became apneic for 15 s, 5 min after receiving plain sufentanil, has a gradual increase in respiratory rate to 10 breaths per minute by the end of the first hour. His PaCO<sub>2</sub> increased to 84 mmHg at 15 min and gradually returned to the normal range during the next 45 min. In two other patients receiving sufentanil plain, the respiratory rate decreased below 10 breaths  $\cdot$  min<sup>-1</sup> within the first 30 min after the second injection with corresponding PaCO<sub>2</sub> is of 60 mmHg.

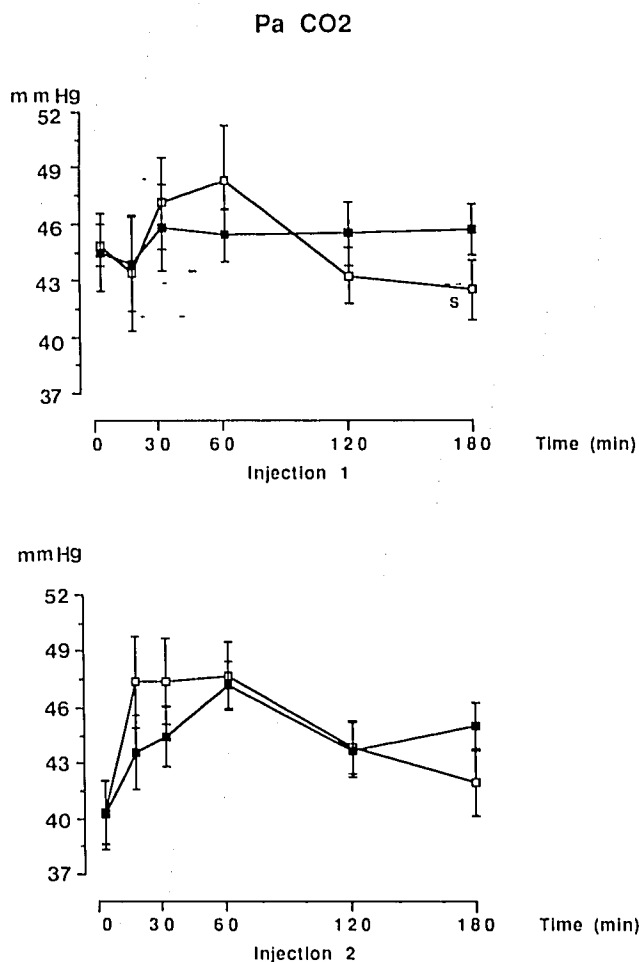

FIG. 3. Changes in  $P_{aCO_2}$  after the first ( $n = 23$ ) and the second ( $n = 21$ ) epidural injections. Means  $\pm$  SEM. There are no significant differences at any point.  $\square$  plain sufentanil;  $\blacksquare$  = sufentanil + epinephrine.

These values returned to control without clinical assistance. The time course of the  $P_{aCO_2}$  for patients in the plain sufentanil and sufentanil-epinephrine groups after both injections are depicted in figure 3. No significant differences were noted. The  $P_{aCO_2}$  following the first injection peaks slightly in the SP group at 60 min, being 51.6 (SEM = 3.6) mmHg, while such a peak is absent in the SE group.

The incidence of nausea, vomiting, and itching was about 10%, occurring equally in each group. Sedation was noted in two patients of each group and urinary retention occurred in nine of 12 patients of the SP group and in six of 11 patients in the SE group ( $P = NS$ ).

**Plasma Concentration of Sufentanil.** Mean plasma sufentanil concentrations after the first and second injections are shown in figure 4. There was a significant reduction in  $AUC_{0-15}$  for patients in the sufentanil-epinephrine group compared with those receiving sufentanil plain after

both injections. The influence of epinephrine, however, was not sustained; the reduction in  $AUC_{0-180}$  by epinephrine was not significant. Peak plasma sufentanil levels were reached at 3 min in the SP group and at 15 min in the SE group after the first injection. The mean plasma concentrations after the first and second injections are listed in table 2.

## DISCUSSION

We speculated that the addition of epinephrine to lipophilic narcotics might reduce their vascular uptake and as a consequence, their systemically mediated side effects. In addition, a greater mass of drug will therefore be available for its local action on neuraxial structures.<sup>1,11</sup> That this hypothesis is correct has been demonstrated for fentanyl,<sup>12</sup> for diacetylmorphine,<sup>3</sup> and in volunteers with sufentanil.<sup>4</sup>

## Sufentanil plasma levels

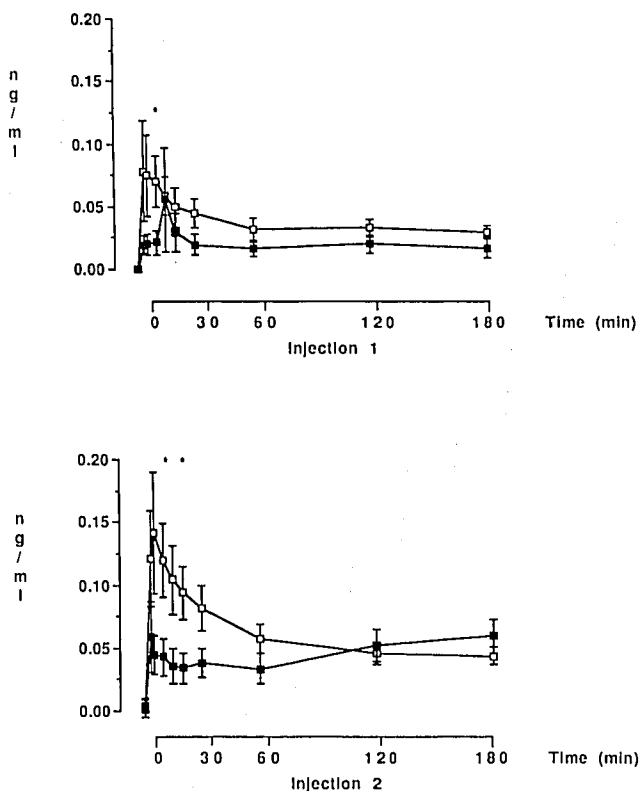

FIG. 4. Sufentanil plasma levels plotted in  $ng \cdot ml^{-1}$  after the first ( $n = 22$ ) and second injections ( $n = 20$ ) of 50  $\mu g$  epidural sufentanil (detection limit 0.01  $ng \cdot ml^{-1}$ ). Mean values  $\pm$  SEM. \*Difference between values ( $P < 0.05$ ).  $\square$  = plain sufentanil;  $\blacksquare$  = sufentanil + epinephrine.

TABLE 2. Sufentanil Plasma Levels: Mean (SEM)

| Time (Min)  | Sufentanil Plain<br>(ng · ml <sup>-1</sup> ) | Sufentanil + Epinephrine 5 μg · ml <sup>-1</sup><br>(ng · ml <sup>-1</sup> ) |
|-------------|----------------------------------------------|------------------------------------------------------------------------------|
| Injection 1 |                                              |                                                                              |
| 0           | 0.0 (0)                                      | 0.0 (0)                                                                      |
| 3           | 0.078 (0.040)                                | 0.019 (0.007)                                                                |
| 5           | 0.075 (0.033)                                | 0.020 (0.008)                                                                |
| 10          | 0.070 (0.021)                                | 0.021 (0.010)                                                                |
| 15          | 0.059 (0.016)                                | 0.056 (0.041)                                                                |
| 20          | 0.049 (0.016)                                | 0.029 (0.016)                                                                |
| 30          | 0.044 (0.011)                                | 0.020 (0.008)                                                                |
| 60          | 0.032 (0.090)                                | 0.016 (0.006)                                                                |
| 120         | 0.033 (0.007)                                | 0.020 (0.007)                                                                |
| 180         | 0.030 (0.004)                                | 0.017 (0.085)                                                                |
| Injection 2 |                                              |                                                                              |
| 0           | 0.020 (0.006)                                | 0.019 (0.007)                                                                |
| 3           | 0.137 (0.038)                                | 0.075 (0.028)                                                                |
| 5           | 0.158 (0.048)                                | 0.061 (0.016)                                                                |
| 10          | 0.137 (0.029)                                | 0.060 (0.015)                                                                |
| 15          | 0.121 (0.028)                                | 0.052 (0.014)                                                                |
| 20          | 0.111 (0.021)                                | 0.051 (0.012)                                                                |
| 30          | 0.098 (0.018)                                | 0.055 (0.011)                                                                |
| 60          | 0.074 (0.012)                                | 0.050 (0.012)                                                                |
| 120         | 0.062 (0.009)                                | 0.068 (0.013)                                                                |
| 180         | 0.060 (0.007)                                | 0.076 (0.013)                                                                |

Many factors influence the quality and duration of analgesia. These include the surgical site and type of surgery; the dose, volume, and criteria for narcotic administration; whether intraoperative local anesthetics were used; and the indefinable variables arising from the patient's clinical status that have a bearing on drug kinetics in the epidural space. The 50-μg dose of sufentanil chosen for this study has been shown in dose-response studies to provide the optimum duration of analgesia with minimal side effects when administered as a bolus.<sup>7,8,13</sup> Although the mean duration of 271 min for plain sufentanil recorded in this study is shorter than the 330 min observed in a previous study that was conducted under identical circumstances, the difference is explained by the end point of analgesia selected.<sup>9</sup> Supplemental sufentanil injections in that study were given when the IVAS score had regressed to 4 or less rather than upon patient's request as in this study. The numerical differences in duration of analgesia between the plain and the sufentanil-epinephrine solutions, while not statistically significant after the first injection (15% longer), did reach significance after the second injection for which a 33% increase in duration was achieved. These results compare favorably with those obtained after lumbar epidural administration for abdominal surgery,<sup>7,14</sup> orthopedic surgery,<sup>8</sup> and experimental pain in volunteers.<sup>4</sup> The common opioid side effects of pruritus, nausea, and urinary retention were not exaggerated by the addition of epinephrine. In fact, the incidence of urinary retention was very close to the rate at which it occurred in a number of similar studies performed in this clinic.<sup>9,15,16</sup>

The differences in respiratory depression as expressed in respiratory rate and PaCO<sub>2</sub> were not statistically significant. However, in our previous study<sup>9</sup> with plain sufentanil (in one patient) and in the present study in the SP group (one patient), an apnea of at least 15 s developed about 3–5 min of the injection of the drug. Plasma sufentanil levels in this group reached their maximum value at this time. This clinically important event could not be translated in terms of statistical significance mainly because of small number of patients in each group, but also because of the sampling scheme. Since respiratory rate was noted only at 0, 5, and 15 min after injection while the first arterial blood sample was taken at 15 min, our methods during the first 15 min are not sensitive enough to detect significant differences. The PaCO<sub>2</sub> at 15 min of the apneic patient increased to 84 mmHg and may have been even higher before that time. Such a clinical event is a good example of the extremely rapid vascular uptake of a highly lipid soluble opioid, such as sufentanil, that can take place from the epidural space.

No significant differences in respiratory rate nor in PaCO<sub>2</sub> as indices of respiratory depression were observed between the two groups. Because the time course of any step decrease in ventilation, as might be expected from the rapid vascular uptake of sufentanil, is not necessarily mirrored by a corresponding rapid increase in PaCO<sub>2</sub>, the respiratory rate is a more sensitive index of early, acute changes of ventilation; in fact, Nunn has drawn attention to the very slow increase of PaCO<sub>2</sub> following a step decrease in ventilation.<sup>17</sup> The steep negative slope of respiratory rate within 15 min of injection in contrast to the

rapid increase of plasma sufentanil is consonant with a systemically mediated respiratory depression rather than the cephalad neuraxial spread of the narcotic. There are presently no data of CSF-uptake following epidural injection of the highly lipid soluble opioids, but it is doubtful, given their affinity to fat, that cephalad neuraxial transportation will have any clinically measurable effect. Obviously unknown is the possible axial spread in the vertebral-cranial venous system. An extreme example of such rapid vascular uptake is the case mentioned in the results where the patient became apneic for 15 s within 5 min after receiving plain sufentanil.

The present study demonstrates the epidural sufentanil, 50  $\mu\text{g}$  in 10 ml saline, provides effective analgesia when administered at a high thoracic level. The results indicate that epinephrine 5  $\mu\text{g} \cdot \text{ml}^{-1}$  when added to epidural sufentanil reduces the overall and peak plasma sufentanil levels, thereby diminishing the potential for early respiratory depression caused by systemic uptake of the drug. The addition of epinephrine also prolongs the duration of analgesia.

The authors wish to thank Henk Noorduyn, Ms.C., and Achiel de Peer, Ph.D., from Janssen Pharmaceutical, Belgium, for the statistical analysis regarding pharmacokinetic aspects.

#### REFERENCES

1. Bromage PR, Camporesi EM, Durant PA, Nielsen CH: Influence of epinephrine as an adjuvant to epidural morphine. *ANESTHESIOLOGY* 58:257-262, 1983
2. Robertson K, Douglas MJ, Mc Morland GH: Epidural fentanyl, with or without epinephrine for post-caesarian section analgesia. *Can Anaesth Soc J* 32:502-505, 1985
3. Jamous MA, Hand CW, Moore RA, Teddy PJ, Mc Quay HJ: Epinephrine reduces systemic absorption of extradural diacetylmorphine. *Anesth Analg* 65:1290-1294, 1986
4. Klepper ID, Sherill DL, Boetger CL, Bromage PK: Analgesia and respiratory effects of extradural sufentanil in volunteers and the influence of adrenaline as an adjuvant. *Br J Anaesth* 59: 1147-1156, 1987
5. Hug CC Jr: Pharmacokinetics of new synthetic narcotic analgesics, Opioids in Anesthesia. Edited by Estafanous FG. Boston, Butterworth Publishers, 1984, pp 37-44
6. Niemegeers CJE, Schellekens KHL, Van Bever WFM, Janssen PAJ: Sufentanil, a very potent and extremely safe intravenous morphine-like compound in mice, rats and dogs. *Arzneimittelforschung* 26:1551-1556, 1976
7. Verborgh C, van der Auwera D, van Droogenbroeck E, Camu F: Epidural sufentanil for post surgical pain relief. *Eur J Anaesthesiol* 3:313-320, 1986
8. Donadoni R, Rolly G, Noorduyn H, van den Bussche G. Epidural sufentanil for postoperative pain relief. *Anaesthesia* 40:634-637, 1985
9. Stanton-Hicks M d'A, Gielen MJM, Hasenbos MA, Mathijssen C, Crul JF: High thoracic epidural with sufentanil for post-thoracotomy pain. *Regional Anesthesia* 13:62-68, 1988
10. Michiels M, Hendriks R, Heykants J: Radioimmunoassay of the new opiate analgesics alfentanil and sufentanil. Preliminary pharmacokinetic profile in man. *J Pharm Pharmacol* 35:86-93, 1983
11. Cousins MJ, Mather LE: Intrathecal and epidural administration of opioids. *ANESTHESIOLOGY* 61:276-310, 1984
12. Welchew EA: The optimum concentration for epidural fentanyl: A randomized double-blind comparison with and without 1: 200,000 adrenaline. *Anaesthesia* 38:1037-1041, 1983
13. Pierrot M: Analgesie peridurale adose elevee de fentanyl: Echec de la methode pour la kinestherapie post-operative precoce avec chirurgie du genou. *Can Anaesth Soc J* 29:587-592, 1982
14. Duckett JE, McDonnell T, Zebrowski M, Witte M: A comparison of thoracic vs. lumbar epidural injections of sufentanil for postoperative analgesia after upper abdominal surgery (abstract). *ANESTHESIOLOGY* 65:3A, 1986
15. Hasenbos MA, van Egmond J, Gielen MJM, Crul JF: Post-operative analgesia by epidural versus intra-muscular nicomorphine after thoracotomy. Part II. *Acta Anaesthesiol Scand* 29:577-582, 1985
16. Hasenbos MA, van Egmond J, Gielen MJM, Crul JF: Post-operative analgesia by high thoracic epidural versus intramuscular nicomorphine after thoracotomy. Part III. The effects of per- and postoperative analgesia on morbidity. *Acta Anaesthesiol Scand* 31:608-615, 1987
17. Nunn JF: Applied Respiratory Physiology, 2nd edition. London, Boston, Butterworth Publishers, 1977, pp 356-358

## ANNOUNCEMENT

The American Board of Anesthesiology (ABA) will administer its third written examination in **Critical Care Medicine** at an airport near Chicago, Illinois, on Friday, September 22, 1989. Diplomates of the ABA who apply and are judged to be qualified by virtue of their additional training or experience in Critical Care Medicine will be accepted for examination. An application may be requested by writing to the Secretary, American Board of Anesthesiology, 100 Constitution Plaza, Hartford, Connecticut 06103-1721. The deadline for receipt of completed applications in the Board office is June 10, 1989.
